# Supplementary material
Source: Research Square preprint supplement (doi:10.21203/rs.3.rs-9294713/v1)
Supplement: Supplementary file 1 [file c962a7a6297f92a667cd0652.docx]

| **Autoantígenos** | **Proteins** | **% of identity** | **Query Cover** |
| --- | --- | --- | --- |
| **Platelet-derived growth factor receptor beta** | Leucine-Rich Serine-Threonine Repeat Protein 2 Kinase [*G. intestinalis* assemblage B] | 33.33% | 21% |
| Mitogen-activated protein kinase, ULK [*G. intestinalis*] | 38.38% | 8% |
| **Serine-interacting receptor** | Kinase, NEK [*G. intestinalis* ATCC 50581] | 31.15% | 25% |
| **Alpha enolase** | Enolase *[G. intestinalis* ATCC 50581] | 51.50% | 95% |
| **HSP 60** | *Chaperonin 60 [G. intestinalis* ATCC 50581] | 37.17% | 90% |
| Putative TCP-1/cpn60 chaperonin family protein *[G. intestinalis]* | 39.52% | 50% |
| 60 kDa of groel chaperonin [*G. intestinalis*] | 43.8% | 24% |

**Table 1: Identity and coverage percentages between *G. intestinalis* antigens and proteins.**

**TABLE 2. Linear epitopes of *G. intestinalis* antigens*.***

| **Proteins** | **Residuos** | **Score** |
| --- | --- | --- |
| **Leucine-Rich Serine-Threonine Repeat Protein 2 Kinase** | **LE1: 281-376**  **LE2: 1-15** | **0.828**  **0.77** |
| **Mitogen-activated protein kinase, ULK** | **LE1: 1-20**  **LE2:233-281**  **LE3:82-88**  **LE4:30-40** | **0.833**  **0.761**  **0.741**  **0.723** |
| **Kinase, NEK** | **LE1: 329-374**  **LE2: 1-38**  **LE3: 638-709**  **LE4: 388- 417**  **LE5: 430-448** | **0.861**  **0.847**  **0.813**  **0.747**  **0.731** |
| **Enolase** | **LE1:264-295**  **LE2:52-88**  **LE3:1-17**  **LE4: 195-219**  **LE5:237-252** | **0.779**  **0.761**  **0.757**  **0.748**  **0.715** |
| **Chaperonin 60** | **LE1:1-20**  **LE2:527-539**  **LE3:432-453**  **LE4:298-323**  **LE5:339-374**  **LE6:106-122**  **LE7:225-248** | **0.859**  **0.814**  **0.801**  **0.788**  **0.783**  **0.779**  **0.726** |
| **Putative TCP-1/cpn60 chaperonin family protein** | **LE1:1-20**  **LE2:101-149**  **LE3:300-321** | **0.888**  **0.805**  **0.731** |
| **60 kDa of groel chaperonin** | **LE1:134-152**  **LE2:42-56** | **0.877**  **0.758** |

**Table 3. Conformational epitopes of *G. intestinalis* antigens.**

| **Proteins** | **Residues** | **score** |
| --- | --- | --- |
| **Enolase** | **CE1:2-136** | **0.708** |
| **Putative TCP-1/cpn60 chaperonin family protein** | **CE1:5-137**  **CE2:39-153** | **0.815**  **0.72** |
| **Chaperonin 60** | **CE1:351-382**  **CE2:4-539**  **CE3:219-323**  **CE4:39-55** | **0.799**  **0.736**  **0.715**  **0.709** |

**TABLE 4. Linear epitopes of autoantigens involved in reactive arthritis.**

| **Autoantigens** | **Residues** | **Score** |
| --- | --- | --- |
| **Platelet-derived growth factor receptor beta** | **LE1: 1-132**  **LE2: 991-1106**  **LE3: 417-551**  **LE4:714-734** | **0.841**  **0.795**  **0.758**  **0.756** |
| **Tyrosine-protein kinase SYK** | **LE1:261-324**  **LE2:438-445**  **LE3:401-419**  **LE4:29-39**  **LE5:169- 236**  **LE6:55-60** | **0.845**  **0.769**  **0.75**  **0.743**  **0.741**  **0.707** |
| **Tyrosine-protein kinase BTK** | **LE1:173-215**  **LE2:67-100**  **LE3:39-54**  **LE4:310-381**  **LE5:9-29**  **LE6:592-628** | **0.846**  **0.782**  **0.758**  **0.758**  **0.745**  **0.73** |
| **Prolyl endopeptidase FAP** | **LE1:540-552**  **LE2:247-270**  **LE3:127-143**  **LE4:321-344**  **LE5:360-391**  **LE6:446-466**  **LE7:276-296**  **LE8:483-517**  **LE9:85-93** | **0.89**  **0.78**  **0.777**  **0.77**  **0.77**  **0.76**  **0.739**  **0.705**  **0.701** |
| **Serine/threonine that interacts with the receptor** | **LE1:417-538**  **LE2:325-413**  **LE3:544-594** | **0.813**  **0.758**  **0.71** |
| **Alpha - enolase** | **LE1:183-207**  **LE2:252-288**  **LE3:48-107**  **LE4:329-336**  **LE5:411-424** | **0.739**  **0.74**  **0.708**  **0.705**  **0.7** |
| **HSP 60** | **LE1:540-552**  **LE2:247-270**  **LE3:127-143**  **LE4:321-344**  **LE5:360-391**  **LE6:446-466**  **LE7:276-296**  **LE8:483-517**  **LE9:85-93** | **0.89**  **0.78**  **0.777**  **0.77**  **0.77**  **0.76**  **0.739**  **0.705**  **0.701** |

**TABLE 5. Conformational epitopes of autoantigens involved in reactive arthritis.**

| **Autoantígens** | **Residues** | **Score** |
| --- | --- | --- |
| **Alpha- enolase** | A:S1, A:I2, A:E3, A:K4, A:I5, A:W6, A:A7, A:R8, A:E9, A:L11, A:D12, A:G15, A:N16, A:D22, A:L23, A:Y24, A:T25, A:A26, A:K27, A:G28, A:L29, A:F30, A:L46, A:L48, A:R49, A:D50, A:G51, A:D52, A:K53, A:Q54, A:R55, A:Y56, A:L57, A:G58, A:K59, A:G60, A:V61, A:L62, A:K63, A:A64, A:V65, A:D66, A:H67, A:I68, A:N69, A:S70, A:T71, A:I72, A:A73, A:P74, A:A75, A:L76, A:I77, A:S78, A:S79, A:G80, A:L81, A:S82, A:V83, A:V84, A:E85, A:E87, A:K88, A:L89, A:N91, A:L92, A:L94, A:E95, A:L96, A:D97, A:G98, A:T99, A:E100, A:N101, A:K102, A:S103, A:K104, A:F105, A:G106, A:A120, A:G121, A:A122, A:A123, A:E124, A:R125, A:E126, A:L127, A:P128, A:R131 | 0.718 |
| **HSP60** | A:K369, A:R370, A:I371, A:Q372, A:E373, A:I374, A:I375, A:E376, A:Q377, A:L378, A:D379, A:V380, A:T381, A:T382, A:S383, A:E384, A:Y385, A:E386, A:K387, A:E388, A:L390, A:N391, A:L394 | 0.805 |
| A:A27, A:K28, A:D29, A:V30, A:K31, A:F32, A:G33, A:A34, A:D35, A:A36, A:R37, A:A38, A:L39, A:M40, A:L41, A:Q42, A:D85, A:L86, A:D88, A:K89, A:Y90, A:K91, A:N92, A:I93, A:G127, A:F128, A:E129, A:K130, A:I131, A:S132, A:K133, A:G134, A:A135, A:N136, A:P137, A:V138, A:E139, A:I140, A:R142, A:G143, A:L146, A:A150, A:E154, A:K157, A:Q158, A:S159, A:C447, A:I448, A:P449, A:A450, A:L451, A:D452, A:S453, A:L454, A:T455, A:P456, A:A457, A:N458, A:E459, A:D460, A:Q461, A:K462, A:I463, A:G464, A:I465, A:E466, A:K469, A:L472, A:T540, A:T541, A:A542, A:E543, A:V544, A:V545, A:V546, A:T547, A:E548, A:I549, A:P550, A:K551, A:E552 | 0.775 |
| A:I224, A:S225, A:Y227, A:D241, A:Y243, A:S247, A:E248, A:K249, A:K250, A:I251, A:S252, A:S253, A:I254, A:Q255, A:S256, A:I257, A:V258, A:P259, A:A260, A:L261, A:E262, A:I263, A:A264, A:N265, A:A266, A:H267, A:K269, A:P270, A:E276, A:D277, A:V278, A:D279, A:G280, A:E281, A:A282, A:L283, A:S284, A:T285, A:L286, A:V287, A:L288, A:N289, A:R290, A:L291, A:K292, A:V293, A:G294, A:L295, A:Q296, A:I318, A:G321, A:G322, A:A323, A:V324, A:F325, A:G326, A:E327, A:E328, A:G329, A:L330, A:T331, A:L332, A:N333, A:L334, A:E335, A:D336, A:V337, A:Q338, A:P339, A:H340, A:D341, A:L342, A:K344, A:G360, A:K361, A:G362, A:D363, A:K364, A:A365, A:Q366, A:I367, A:E368 | 0.738 |
